# Supplementary material for: Metabolic effect of adrenaline infusion in people with type 1 diabetes and healthy individuals
Source: Springer Nature journal article supplement (doi:10.1007/s00125-024-06116-5), 2024-03-01
Supplement: MOESM1 [file 26808316]

**Electronic Supplementary Material Table 1a: Linear mixed model comparison analyses of the stepwise adrenaline infusion in the participants with type 1 diabetes and healthy controls.** Linear mixed model with and without group-intervention interaction were performed on GIR and the hormonal parameters, while only linear mixed model with group-intervention interaction were performed on the metabolic outcomes.

|                   | Parameter          | Coefficient | 95% Confidence interval |        | P     |
|-------------------|--------------------|-------------|-------------------------|--------|-------|
|                   |                    |             | Lower                   | Upper  |       |
| GIR               | Group              | -135.80     | -267.48                 | -4.12  | 0.044 |
|                   | Group – Adrenaline | -0.071      | -3.01                   | 2.87   | 0.94  |
| Insulin           | Group              | 8.59        | -12.45                  | 29.63  | 0.41  |
|                   | Group – Adrenaline | 0.21        | -0.045                  | 0.47   | 0.10  |
| Adrenaline        | Group              | 0.043       | -0.27                   | 0.35   | 0.78  |
|                   | Group – Adrenaline | -0.0058     | -0.018                  | 0.0062 | 0.70  |
| Noradrenaline     | Group              | -0.14       | -0.68                   | 0.39   | 0.55  |
|                   | Group – Adrenaline | -0.0030     | -0.012                  | 0.0062 | 0.57  |
| Glucagon          | Group              | -1.95       | -4.71                   | 0.81   | 0.16  |
|                   | Group – Adrenaline | 0.0011      | -0.033                  | 0.036  | 0.95  |
| Metabolic Outcome |                    |             |                         |        |       |
| iAUC              | Group – Adrenaline | -0.10       | -0.40                   | 0.20   | 0.46  |
| NEFA              | Group – Adrenaline | 3.28        | 0.51                    | 6.04   | 0.029 |
| Glycerol          | Group – Adrenaline | 0.72        | -0.074                  | 1.51   | 0.075 |

**Electronic Supplementary Material Table 1b: Linear mixed model comparison analyses of the stepwise adrenaline infusion in the participants with type 1 diabetes and healthy controls, adjusted for M/I ratio and age.** Linear mixed model with and without group-intervention interaction were performed on GIR and the hormonal parameters, while only linear mixed model with group-intervention interaction were performed on the metabolic outcomes.

|                   | Parameter          | Coefficient | 95% Confidence interval |        | P     |
|-------------------|--------------------|-------------|-------------------------|--------|-------|
|                   |                    |             | Lower                   | Upper  |       |
| GIR               | Group              | -154.42     | -293.39                 | -15.44 | 0.031 |
|                   | Group – Adrenaline | 0.44        | -2.40                   | 3.29   | 0.75  |
| Insulin           | Group              | 11.31       | -4.30                   | 26.93  | 0.15  |
|                   | Group – Adrenaline | 0.22        | -0.034                  | 0.47   | 0.088 |
| Adrenaline        | Group              | 0.015       | -0.29                   | 0.32   | 0.92  |
|                   | Group – Adrenaline | -0.0076     | -0.020                  | 0.0043 | 0.20  |
| Noradrenaline     | Group              | -0.35       | -0.81                   | 0.11   | 0.13  |
|                   | Group – Adrenaline | -0.0024     | -0.012                  | 0.0072 | 0.61  |
| Glucagon          | Group              | -1.95       | -4.88                   | 0.98   | 0.18  |
|                   | Group – Adrenaline | 0.0011      | -0.035                  | 0.037  | 0.95  |
| Metabolic Outcome |                    |             |                         |        |       |
| iAUC              | Group – Adrenaline | -0.10       | -0.39                   | 0.19   | 0.49  |
| NEFA              | Group – Adrenaline | 3.28        | 0.51                    | 6.04   | 0.022 |
| Glycerol          | Group – Adrenaline | 0.78        | 0.26                    | 1.30   | 0.005 |

**Electronic Supplementary Material Table 2a: Metabolite changes to the adrenaline infusions in participants with type 1 diabetes using untargeted metabolomics profiling.** Metabolomics data before and after the completion of the stepwise adrenaline infusions were assessed using linear mixed-effects model. Data are presented as a coefficient with confidence interval. Raw P-values are shown and the adjusted P-values using Benjamini-Hochberg.

| Metabolites                    | Coefficient | 95% Confidence interval |          | P        | P <sub>BH</sub> |
|--------------------------------|-------------|-------------------------|----------|----------|-----------------|
|                                |             | Lower                   | Upper    |          |                 |
| Melibiose                      | 1.1400      | 0.7970                  | 1.49000  | 3.61e-09 | 1.77e-07        |
| Glycolic acid                  | 1.0000      | 0.6050                  | 1.40000  | 2.77e-06 | 6.74e-05        |
| Isoleucine                     | -0.8470     | -1.1900                 | -0.50500 | 4.13e-06 | 6.74e-05        |
| L-Norleucine                   | -0.8330     | -1.1800                 | -0.49000 | 5.85e-06 | 7.17e-05        |
| Valine                         | -0.7670     | -1.0900                 | -0.44400 | 9.40e-06 | 9.21e-05        |
| Pyruvic acid                   | 0.9170      | 0.5160                  | 1.32000  | 1.79e-05 | 1.11e-04        |
| 4-amino-3-hydroxyButanoic acid | -0.8400     | -1.2100                 | -0.47200 | 1.81e-05 | 1.11e-04        |
| D-Gluconic acid                | 0.9110      | 0.5120                  | 1.31000  | 1.81e-05 | 1.11e-04        |
| Dodecanoic acid                | 0.9770      | 0.5390                  | 1.41000  | 2.75e-05 | 1.50e-04        |
| Leucine                        | -0.7710     | -1.1300                 | -0.41500 | 4.30e-05 | 2.11e-04        |
| Tetradecanoic acid             | 0.9150      | 0.4900                  | 1.34000  | 4.90e-05 | 2.12e-04        |
| Oleic acid                     | 0.9370      | 0.5000                  | 1.37000  | 5.19e-05 | 2.12e-04        |
| Ornithine                      | -0.6420     | -0.9850                 | -0.30000 | 3.42e-04 | 1.29e-03        |
| N-Methyl-DL-Alanine            | -0.6550     | -1.0100                 | -0.29900 | 4.42e-04 | 1.55e-03        |
| L- $\alpha$ -Aminobutyric acid | -0.6400     | -0.9970                 | -0.28200 | 6.13e-04 | 1.97e-03        |
| Methionine                     | -0.6440     | -1.0100                 | -0.28300 | 6.43e-04 | 1.97e-03        |
| L-2-Aminobutyric acid          | -0.6300     | -0.9900                 | -0.26900 | 8.08e-04 | 2.20e-03        |
| Serine                         | -0.6640     | -1.0400                 | -0.28400 | 8.10e-04 | 2.20e-03        |
| L-Norvaline                    | -0.5870     | -0.9380                 | -0.23600 | 1.29e-03 | 3.34e-03        |
| L-5-Oxoproline                 | -0.6180     | -0.9930                 | -0.24300 | 1.53e-03 | 3.75e-03        |
| Threonine                      | -0.6050     | -0.9780                 | -0.23200 | 1.78e-03 | 4.16e-03        |
| $\alpha$ -Ketoglutaric acid    | 0.6420      | 0.2390                  | 1.04000  | 2.15e-03 | 4.79e-03        |
| Phenylalanine                  | -0.5580     | -0.9150                 | -0.20000 | 2.65e-03 | 5.50e-03        |
| Proline                        | -0.6220     | -1.0200                 | -0.22200 | 2.69e-03 | 5.50e-03        |
| Tyrosine                       | -0.5040     | -0.8370                 | -0.17100 | 3.43e-03 | 6.73e-03        |
| Palmitic acid                  | 0.6500      | 0.2090                  | 1.09000  | 4.31e-03 | 8.13e-03        |
| Linoleic acid                  | 0.6150      | 0.1960                  | 1.03000  | 4.51e-03 | 8.18e-03        |
| Palmitoleic acid               | 0.6100      | 0.1900                  | 1.03000  | 4.94e-03 | 8.64e-03        |
| N-Acetyl-D-glucosamine         | 0.6240      | 0.1890                  | 1.06000  | 5.47e-03 | 9.24e-03        |
| Stearic acid                   | 0.5920      | 0.1680                  | 1.02000  | 6.72e-03 | 1.10e-02        |
| Malic acid                     | 0.5170      | 0.0710                  | 0.96300  | 2.36e-02 | 3.73e-02        |
| 4-Methylvaleric acid           | -0.4100     | -0.7820                 | -0.03820 | 3.11e-02 | 4.63e-02        |
| Lysine                         | -0.3790     | -0.7220                 | -0.03500 | 3.12e-02 | 4.63e-02        |
| Deconic acid                   | 0.4390      | 0.0306                  | 0.84800  | 3.54e-02 | 5.11e-02        |
| Glycine                        | -0.3390     | -0.6860                 | 0.00904  | 5.61e-02 | 7.86e-02        |
| Alanine                        | -0.3180     | -0.6890                 | 0.05340  | 9.24e-02 | 1.26e-01        |
| Aspartic acid                  | 0.3210      | -0.0854                 | 0.72700  | 1.20e-01 | 1.59e-01        |
| Maltose                        | -0.3290     | -0.7960                 | 0.13900  | 1.66e-01 | 2.14e-01        |
| Glutamine                      | -0.2200     | -0.5940                 | 0.15500  | 2.47e-01 | 3.10e-01        |
| Glutamic acid                  | -0.1970     | -0.5750                 | 0.18200  | 3.04e-01 | 3.73e-01        |
| L-Histidine                    | -0.1760     | -0.5350                 | 0.18200  | 3.30e-01 | 3.95e-01        |
| L-Tryptophan                   | -0.1800     | -0.6340                 | 0.27400  | 4.33e-01 | 5.06e-01        |
| D-(+)-Xylose                   | -0.0739     | -0.4420                 | 0.29500  | 6.91e-01 | 7.88e-01        |
| 3-Indoleacetic acid            | -0.0473     | -0.4080                 | 0.31300  | 7.95e-01 | 8.70e-01        |
| Cysteine                       | 0.0510      | -0.3450                 | 0.44800  | 7.99e-01 | 8.70e-01        |
| Glyoxylic acid                 | -0.0361     | -0.4170                 | 0.34500  | 8.51e-01 | 8.91e-01        |
| D-Galactose                    | -0.0400     | -0.4730                 | 0.39300  | 8.55e-01 | 8.91e-01        |
| Malonic acid                   | 0.0335      | -0.4130                 | 0.47900  | 8.82e-01 | 9.00e-01        |
| 3-Hydroxybutyric acid          | 0.0176      | -0.4220                 | 0.45700  | 9.37e-01 | 9.37e-01        |

**Electronic Supplementary Material Table 2b: Metabolite changes to the adrenaline infusions in participants with type 1 diabetes using untargeted metabolomics profiling adjusted for M/I ratio and age.** Metabolomics data before and after the completion of the stepwise adrenaline infusions were assessed using linear mixed-effects model. Data are presented as a coefficient with confidence interval. Raw P-values are shown and the adjusted P-values using Benjamini-Hochberg.

| Metabolites                    | Coefficient | 95% Confidence interval |         | P        | P <sub>BH</sub> |
|--------------------------------|-------------|-------------------------|---------|----------|-----------------|
|                                |             | Lower                   | Upper   |          |                 |
| Melibiose                      | 1.1300      | 0.7640                  | 1.5000  | 4.60e-08 | 2.16e-06        |
| Isoleucine                     | -0.8830     | -1.2400                 | -0.5260 | 5.07e-06 | 1.06e-04        |
| L-Norleucine                   | -0.8710     | -1.2300                 | -0.5130 | 6.76e-06 | 1.06e-04        |
| Glycolic acid                  | 0.9380      | 0.5150                  | 1.3600  | 3.40e-05 | 3.17e-04        |
| Oleic acid                     | 1.0200      | 0.5480                  | 1.4800  | 4.70e-05 | 3.17e-04        |
| Dodecanoic acid                | 1.0200      | 0.5500                  | 1.4900  | 4.73e-05 | 3.17e-04        |
| Leucine                        | -0.8100     | -1.1800                 | -0.4360 | 4.95e-05 | 3.17e-04        |
| Valine                         | -0.7370     | -1.0800                 | -0.3920 | 6.02e-05 | 3.17e-04        |
| Tetradecanoic acid             | 0.9660      | 0.5100                  | 1.4200  | 6.80e-05 | 3.17e-04        |
| 4-amino-3-hydroxybutanoic acid | -0.8170     | -1.2000                 | -0.4320 | 6.81e-05 | 3.17e-04        |
| D-Gluconic acid                | 0.9140      | 0.4800                  | 1.3500  | 7.42e-05 | 3.17e-04        |
| Pyruvic acid                   | 0.8460      | 0.4240                  | 1.2700  | 1.53e-04 | 5.98e-04        |
| N-Methyl-DL-Alanine            | -0.6680     | -1.0400                 | -0.2960 | 6.27e-04 | 2.27e-03        |
| L- $\alpha$ -Aminobutyric acid | -0.6520     | -1.0300                 | -0.2780 | 8.66e-04 | 2.88e-03        |
| Methionine                     | -0.6590     | -1.0400                 | -0.2790 | 9.18e-04 | 2.88e-03        |
| Ornithine                      | -0.6240     | -0.9870                 | -0.2620 | 9.87e-04 | 2.90e-03        |
| L-2-Aminobutyric acid          | -0.6400     | -1.0200                 | -0.2620 | 1.17e-03 | 3.20e-03        |
| Serine                         | -0.6840     | -1.0900                 | -0.2790 | 1.22e-03 | 3.20e-03        |
| L-Norvaline                    | -0.6050     | -0.9760                 | -0.2350 | 1.72e-03 | 4.27e-03        |
| L-5-Oxoproline                 | -0.6390     | -1.0300                 | -0.2430 | 1.94e-03 | 4.55e-03        |
| Phenylalanine                  | -0.5960     | -0.9680                 | -0.2240 | 2.10e-03 | 4.69e-03        |
| Threonine                      | -0.6050     | -0.9990                 | -0.2110 | 3.10e-03 | 6.62e-03        |
| Palmitoleic acid               | 0.6800      | 0.2320                  | 1.1300  | 3.45e-03 | 6.90e-03        |
| Proline                        | -0.6440     | -1.0700                 | -0.2160 | 3.72e-03 | 6.90e-03        |
| Linoleic acid                  | 0.6800      | 0.2270                  | 1.1300  | 3.78e-03 | 6.90e-03        |
| Palmitic acid                  | 0.7090      | 0.2360                  | 1.1800  | 3.82e-03 | 6.90e-03        |
| Stearic acid                   | 0.6510      | 0.2030                  | 1.1000  | 4.99e-03 | 8.68e-03        |
| Tyrosine                       | -0.4890     | -0.8330                 | -0.1460 | 5.89e-03 | 9.89e-03        |
| N-Acetyl-D-glucosamine         | 0.5570      | 0.0897                  | 1.0200  | 2.02e-02 | 3.27e-02        |
| 4-Methylvaleric acid           | -0.4420     | -0.8280                 | -0.0556 | 2.56e-02 | 4.00e-02        |
| Lysine                         | -0.3790     | -0.7300                 | -0.0281 | 3.47e-02 | 5.26e-02        |
| Deconic acid                   | 0.4680      | 0.0317                  | 0.9040  | 3.59e-02 | 5.27e-02        |
| Glycine                        | -0.3810     | -0.7410                 | -0.0213 | 3.82e-02 | 5.44e-02        |
| Alanine                        | -0.4010     | -0.7900                 | -0.0120 | 4.35e-02 | 6.02e-02        |
| Aspartic acid                  | 0.3480      | -0.0908                 | 0.7860  | 1.18e-01 | 1.59e-01        |
| L-Tryptophan                   | -0.3330     | -0.7970                 | 0.1320  | 1.58e-01 | 2.07e-01        |
| Maltose                        | -0.3420     | -0.8480                 | 0.1640  | 1.82e-01 | 2.31e-01        |
| Isobutylamine                  | -0.2340     | -0.6520                 | 0.1840  | 2.69e-01 | 3.33e-01        |
| Glutamic acid                  | -0.2100     | -0.6040                 | 0.1850  | 2.93e-01 | 3.53e-01        |
| L-Histidine                    | -0.1950     | -0.5710                 | 0.1800  | 3.03e-01 | 3.56e-01        |
| Glutamine                      | -0.1860     | -0.5820                 | 0.2100  | 3.52e-01 | 4.03e-01        |
| D-(+)-Xylose                   | -0.0871     | -0.4640                 | 0.2900  | 6.46e-01 | 7.23e-01        |
| 3-Indoleacetic acid            | -0.0583     | -0.4440                 | 0.3270  | 7.64e-01 | 8.35e-01        |
| D-Galactose                    | -0.0572     | -0.4960                 | 0.3820  | 7.96e-01 | 8.50e-01        |
| Malonic acid                   | 0.0444      | -0.4340                 | 0.5230  | 8.54e-01 | 8.73e-01        |
| Glyoxylic acid                 | -0.0372     | -0.4410                 | 0.3670  | 8.55e-01 | 8.73e-01        |
| 3-Hydroxybutyric acid          | 0.0312      | -0.4400                 | 0.5030  | 8.95e-01 | 8.95e-01        |

**Electronic Supplementary Material Table 3a: Impact of hypoglycaemic exposure using time below range level 1.** Metabolomics data before and after the completion of the adrenaline infusions of the participants with type 1 diabetes before were assessed using linear mixed-effects model and TBR level 1 as fixed factor. Data are presented as a coefficient with confidence interval. Raw P-values are shown and the adjusted P-values using Benjamini-Hochberg.

| Metabolites                               | Coefficient | 95% Confidence interval |       | P    | P <sub>BH</sub> |
|-------------------------------------------|-------------|-------------------------|-------|------|-----------------|
|                                           |             | Lower                   | Upper |      |                 |
| L-Hydroxyproline                          | -12.70      | -21.80                  | -3.50 | 0.01 | 0.47            |
| DL-Pyroglutamic acid                      | -12.50      | -21.70                  | -3.27 | 0.01 | 0.47            |
| 3-Hydroxyisovaleric acid                  | 12.20       | 3.14                    | 21.40 | 0.01 | 0.47            |
| Octanoic acid                             | -11.60      | -20.60                  | -2.56 | 0.01 | 0.48            |
| N-Acetyl-D-glucosamine                    | 10.80       | 2.10                    | 19.50 | 0.02 | 0.48            |
| Palmitic acid                             | -11.00      | -20.00                  | -1.92 | 0.02 | 0.48            |
| Linoleic acid                             | -10.40      | -19.30                  | -1.42 | 0.02 | 0.48            |
| L-Tryptophan                              | 10.60       | 1.42                    | 19.70 | 0.02 | 0.48            |
| Stearic acid                              | -9.94       | -18.90                  | -0.97 | 0.03 | 0.53            |
| Methyl stearate                           | -9.29       | -18.10                  | -0.44 | 0.04 | 0.53            |
| Oleic acid                                | -9.43       | -18.40                  | -0.43 | 0.04 | 0.53            |
| Glutamic acid                             | 9.37        | 0.35                    | 18.40 | 0.04 | 0.53            |
| Nonanoic acid                             | -9.30       | -18.30                  | -0.33 | 0.04 | 0.53            |
| Arachidonic acid                          | -8.67       | -17.50                  | 0.20  | 0.06 | 0.61            |
| Methyl linoleate                          | -8.60       | -17.40                  | 0.23  | 0.06 | 0.61            |
| Uric acid                                 | -8.56       | -17.50                  | 0.42  | 0.06 | 0.62            |
| Heptanoic acid                            | -8.28       | -17.30                  | 0.75  | 0.07 | 0.69            |
| Aminomalonic acid                         | -7.82       | -16.80                  | 1.14  | 0.09 | 0.78            |
| Acetoacetic acid                          | 7.78        | -1.42                   | 17.00 | 0.10 | 0.83            |
| $\alpha$ -Ketoglutaric acid               | 7.31        | -1.64                   | 16.30 | 0.11 | 0.88            |
| Ribitol                                   | -7.05       | -16.00                  | 1.91  | 0.12 | 0.92            |
| 2-Methylglutaric acid                     | -7.10       | -16.20                  | 1.98  | 0.13 | 0.92            |
| L-Pipecolic acid                          | -6.83       | -15.80                  | 2.09  | 0.13 | 0.92            |
| Tetradecanoic acid                        | -6.76       | -15.70                  | 2.21  | 0.14 | 0.92            |
| Nonacosane                                | -6.75       | -15.90                  | 2.44  | 0.15 | 0.92            |
| Dodecanoic acid                           | -6.53       | -15.50                  | 2.49  | 0.16 | 0.92            |
| Methyl hexadecanoic acid                  | -6.26       | -15.20                  | 2.68  | 0.17 | 0.92            |
| Decanoic acid                             | -6.29       | -15.30                  | 2.70  | 0.17 | 0.92            |
| Hypoxanthine                              | 6.35        | -2.73                   | 15.40 | 0.17 | 0.92            |
| Pseudo uridine                            | -6.19       | -15.10                  | 2.69  | 0.17 | 0.92            |
| Phosphoric acid 2,3-dihydroxypropyl ester | -6.08       | -15.00                  | 2.84  | 0.18 | 0.94            |
| Trehalose                                 | -5.71       | -14.40                  | 3.03  | 0.20 | 0.98            |
| 1-Monopalmitin                            | -5.72       | -14.50                  | 3.09  | 0.20 | 0.98            |
| $\beta$ -Tocopherol                       | -5.64       | -14.50                  | 3.21  | 0.21 | 0.98            |
| L-5-Oxoproline                            | -5.59       | -14.50                  | 3.26  | 0.22 | 0.98            |
| 2-Palmitoylglycerol                       | -5.55       | -14.40                  | 3.31  | 0.22 | 0.98            |
| Cholesterol                               | -5.55       | -14.50                  | 3.45  | 0.23 | 0.99            |
| D-Galactose (1E)                          | 5.49        | -3.53                   | 14.50 | 0.23 | 0.99            |
| D-Glucose 6-phosphate                     | -5.22       | -14.50                  | 4.03  | 0.27 | 0.99            |
| Phosphonoacetate                          | -4.91       | -14.00                  | 4.19  | 0.29 | 0.99            |
| $\alpha$ -Tocopherol                      | -4.65       | -13.60                  | 4.29  | 0.31 | 0.99            |
| Ketovaline                                | -4.59       | -13.60                  | 4.38  | 0.31 | 0.99            |
| Glutamic acid-d5                          | 4.35        | -4.37                   | 13.10 | 0.33 | 0.99            |
| D-(+)-Trehalose                           | -4.52       | -13.80                  | 4.74  | 0.34 | 0.99            |
| 2-Methyl-6-tert-butylphenol               | -4.32       | -13.40                  | 4.77  | 0.35 | 0.99            |
| Aspartic acid                             | 4.21        | -4.80                   | 13.20 | 0.36 | 0.99            |
| 2-Ketoisocaproic acid                     | 4.40        | -5.08                   | 13.90 | 0.36 | 0.99            |
| Palmitoleic acid                          | -4.08       | -13.10                  | 4.97  | 0.38 | 0.99            |
| Fumaric acid                              | -4.05       | -13.10                  | 5.02  | 0.38 | 0.99            |
| D-Glucarate                               | -3.88       | -12.70                  | 4.92  | 0.39 | 0.99            |
| D-(-)-Rhamnose                            | -3.88       | -12.80                  | 5.03  | 0.39 | 0.99            |

|                                    |       |        |       |      |      |
|------------------------------------|-------|--------|-------|------|------|
| Linolenic acid                     | -3.82 | -12.70 | 5.02  | 0.40 | 0.99 |
| Ethanolamine                       | -3.83 | -12.70 | 5.06  | 0.40 | 0.99 |
| 2-Hydroxypyridine                  | -3.80 | -12.90 | 5.27  | 0.41 | 0.99 |
| Glyceryl-glycoside                 | -3.57 | -12.30 | 5.17  | 0.42 | 0.99 |
| 2,3-Dihydroxybutanoic acid         | -3.48 | -12.30 | 5.37  | 0.44 | 0.99 |
| Pyrophosphate                      | 3.42  | -5.42  | 12.30 | 0.45 | 0.99 |
| 3-Pyridinol                        | -3.41 | -12.40 | 5.55  | 0.45 | 0.99 |
| N-Acetylneuraminate                | -3.19 | -12.00 | 5.58  | 0.47 | 0.99 |
| Heptadecanoate                     | -3.32 | -12.50 | 5.86  | 0.48 | 0.99 |
| Ribonic acid                       | -3.17 | -11.90 | 5.60  | 0.48 | 0.99 |
| Levoglucosan                       | -3.16 | -12.00 | 5.66  | 0.48 | 0.99 |
| 4-amino-3-hydroxybutanoic acid     | -3.03 | -11.80 | 5.74  | 0.50 | 0.99 |
| Glycine                            | -2.73 | -11.50 | 6.04  | 0.54 | 0.99 |
| Dihydrouracil                      | -2.73 | -11.50 | 6.05  | 0.54 | 0.99 |
| 2,5-di-tert-butyl-1,4-benzoquinone | 2.76  | -6.24  | 11.80 | 0.55 | 0.99 |
| Glyoxylic acid                     | -2.70 | -11.60 | 6.21  | 0.55 | 0.99 |
| Tetradecanol                       | -2.77 | -11.90 | 6.39  | 0.55 | 0.99 |
| Methylmalonic acid                 | -2.66 | -11.50 | 6.20  | 0.56 | 0.99 |
| n-Butylamine                       | -2.75 | -11.90 | 6.42  | 0.56 | 0.99 |
| Ornithine                          | -2.62 | -11.30 | 6.11  | 0.56 | 0.99 |
| Triethylene glycol                 | -2.62 | -11.40 | 6.20  | 0.56 | 0.99 |
| 3-Hydroxybutyric acid              | -2.71 | -11.90 | 6.47  | 0.56 | 0.99 |
| Methionine                         | 2.57  | -6.24  | 11.40 | 0.57 | 0.99 |
| 4,4-Dibromooctafluorobiphenyl      | 2.47  | -6.21  | 11.20 | 0.58 | 0.99 |
| Decenoyl-ACP                       | -2.52 | -11.40 | 6.32  | 0.58 | 0.99 |
| Parabanic acid                     | 2.47  | -6.42  | 11.40 | 0.59 | 0.99 |
| Malic acid                         | -2.48 | -11.50 | 6.56  | 0.59 | 0.99 |
| D-(+)-Galacturonic acid            | 2.47  | -6.60  | 11.50 | 0.59 | 0.99 |
| D-Galactose (1Z)                   | -2.39 | -11.20 | 6.42  | 0.59 | 0.99 |
| Tryptophan                         | 2.44  | -6.57  | 11.40 | 0.59 | 0.99 |
| 1,6-Anhydroglucose                 | -2.31 | -11.00 | 6.43  | 0.60 | 0.99 |
| Succinic acid                      | -2.32 | -11.20 | 6.53  | 0.61 | 0.99 |
| p-Cresol                           | -2.39 | -11.60 | 6.78  | 0.61 | 0.99 |
| Ibuprofen                          | 2.27  | -6.54  | 11.10 | 0.61 | 0.99 |
| 3-Indoleacetic acid                | -2.23 | -11.10 | 6.59  | 0.62 | 0.99 |
| Sorbitol                           | -2.26 | -11.30 | 6.78  | 0.62 | 0.99 |
| Glutamine                          | 2.20  | -6.70  | 11.10 | 0.63 | 0.99 |
| Maltose                            | -2.21 | -11.20 | 6.74  | 0.63 | 0.99 |
| Oxalic acid                        | -2.21 | -11.30 | 6.90  | 0.63 | 0.99 |
| Pyruvic acid                       | 2.14  | -6.75  | 11.00 | 0.64 | 0.99 |
| n-Propylamine                      | -2.12 | -10.90 | 6.70  | 0.64 | 0.99 |
| Diethanolamine                     | 2.19  | -7.01  | 11.40 | 0.64 | 0.99 |
| D-(-)-Tagatofuranose               | 2.18  | -6.99  | 11.40 | 0.64 | 0.99 |
| D-(+)-Xylose                       | -2.11 | -11.00 | 6.77  | 0.64 | 0.99 |
| Proline                            | -2.09 | -11.00 | 6.82  | 0.64 | 0.99 |
| $\beta$ -D-Glucopyranose           | 2.08  | -6.90  | 11.10 | 0.65 | 0.99 |
| 3-Indolepropionic acid             | -2.02 | -10.80 | 6.75  | 0.65 | 0.99 |
| $\beta$ -Alanine                   | -2.00 | -10.80 | 6.80  | 0.66 | 0.99 |
| L-Histidine                        | 1.94  | -6.92  | 10.80 | 0.67 | 0.99 |
| 2-hydroxypropanoic acid            | 1.94  | -6.97  | 10.80 | 0.67 | 0.99 |
| 3-Hydroxyicosatetraenoyl-CoA       | -2.00 | -11.30 | 7.25  | 0.67 | 0.99 |
| Isoleucine                         | 1.87  | -6.88  | 10.60 | 0.68 | 0.99 |
| Valine                             | -1.84 | -10.50 | 6.84  | 0.68 | 0.99 |
| Glyceric acid                      | -1.87 | -10.70 | 6.95  | 0.68 | 0.99 |
| Melibiose                          | 1.75  | -7.04  | 10.50 | 0.70 | 0.99 |
| Valine-d8                          | 1.72  | -7.03  | 10.50 | 0.70 | 0.99 |
| Hydroquinone                       | -1.67 | -10.30 | 6.98  | 0.71 | 0.99 |
| D-Fucitol                          | -1.69 | -10.50 | 7.11  | 0.71 | 0.99 |
| Benzoic acid                       | 1.76  | -7.45  | 11.00 | 0.71 | 0.99 |
| Succinic acid-d4                   | 1.64  | -7.03  | 10.30 | 0.71 | 0.99 |

|                                   |        |        |       |      |      |
|-----------------------------------|--------|--------|-------|------|------|
| Serine                            | -1.63  | -10.50 | 7.25  | 0.72 | 0.99 |
| d-Glucose                         | -1.63  | -10.60 | 7.34  | 0.72 | 0.99 |
| L-Norleucine                      | 1.57   | -7.19  | 10.30 | 0.72 | 0.99 |
| Alanine                           | -1.55  | -10.40 | 7.31  | 0.73 | 0.99 |
| Taurine                           | -1.58  | -10.80 | 7.67  | 0.74 | 0.99 |
| L-Threonic acid                   | -1.45  | -10.20 | 7.28  | 0.74 | 0.99 |
| L-Arginine                        | 1.43   | -7.18  | 10.00 | 0.74 | 0.99 |
| Putrescine                        | -1.41  | -10.30 | 7.45  | 0.75 | 0.99 |
| Malonic acid                      | -1.43  | -10.60 | 7.75  | 0.76 | 0.99 |
| Docosahexaenoic acid              | -1.36  | -10.20 | 7.48  | 0.76 | 0.99 |
| 1,3-Propanediol                   | 1.36   | -7.55  | 10.30 | 0.76 | 0.99 |
| 2-Keto-3-methylpentanoic acid     | -1.40  | -10.60 | 7.84  | 0.77 | 0.99 |
| 1-Dodecanol                       | -1.34  | -10.40 | 7.73  | 0.77 | 0.99 |
| Eicosapentaenoic acid             | -1.12  | -9.91  | 7.67  | 0.80 | 0.99 |
| Citric acid                       | 1.12   | -7.74  | 9.97  | 0.80 | 0.99 |
| Leucine                           | 1.08   | -7.69  | 9.85  | 0.81 | 0.99 |
| Myo-inositol                      | -1.08  | -9.86  | 7.70  | 0.81 | 0.99 |
| Glycolic acid                     | -1.04  | -9.77  | 7.69  | 0.82 | 0.99 |
| Heptadecanoic acid-d33            | 0.99   | -7.73  | 9.70  | 0.82 | 0.99 |
| Threonine                         | -1.00  | -9.87  | 7.87  | 0.82 | 0.99 |
| Phenoxyacetic acid                | -0.97  | -9.79  | 7.85  | 0.83 | 0.99 |
| D-(-)-Lyxofuranose                | 0.97   | -7.99  | 9.93  | 0.83 | 0.99 |
| Tyrosine                          | -0.92  | -9.65  | 7.81  | 0.84 | 0.99 |
| Lysine                            | 0.91   | -7.86  | 9.67  | 0.84 | 0.99 |
| Acetylsalicylic acid              | 0.91   | -7.97  | 9.80  | 0.84 | 0.99 |
| Cysteine                          | 0.90   | -8.16  | 9.95  | 0.85 | 0.99 |
| D-Gluconic acid                   | 0.84   | -8.04  | 9.71  | 0.85 | 0.99 |
| Phosphoric acid                   | 0.71   | -8.25  | 9.66  | 0.88 | 0.99 |
| Butyl hexadecanoic acid           | 0.70   | -8.52  | 9.91  | 0.88 | 0.99 |
| $\alpha$ -D-(-)-Tagatopyran       | -0.70  | -10.10 | 8.67  | 0.88 | 0.99 |
| N-Methyl-DL-Alanine               | -0.66  | -9.47  | 8.16  | 0.88 | 0.99 |
| Isobutylamine                     | -0.66  | -9.69  | 8.37  | 0.89 | 0.99 |
| L-2-Aminobutyric acid             | -0.63  | -9.45  | 8.20  | 0.89 | 0.99 |
| L-(-)-Sorbitol                    | 0.59   | -8.17  | 9.36  | 0.89 | 0.99 |
| L-Norvaline                       | -0.53  | -9.30  | 8.24  | 0.91 | 0.99 |
| L- $\alpha$ -Aminobutyric acid    | -0.53  | -9.34  | 8.28  | 0.91 | 0.99 |
| Diethylene glycol                 | 0.53   | -8.42  | 9.48  | 0.91 | 0.99 |
| 1,5-Anhydrohexitol                | -0.49  | -9.36  | 8.38  | 0.91 | 0.99 |
| Ketoisoleucine                    | -0.50  | -9.88  | 8.88  | 0.92 | 0.99 |
| Phosphoric acid, monomethyl ester | 0.46   | -8.40  | 9.31  | 0.92 | 0.99 |
| D-Arabitol                        | -0.32  | -9.24  | 8.60  | 0.94 | 0.99 |
| L-(-)-Arabitol                    | 0.29   | -8.39  | 8.97  | 0.95 | 0.99 |
| O-Phosphoethanolamine             | -0.29  | -9.17  | 8.60  | 0.95 | 0.99 |
| Phenylalanine                     | -0.26  | -9.10  | 8.57  | 0.95 | 0.99 |
| Urea                              | 0.26   | -8.58  | 9.09  | 0.96 | 0.99 |
| 4-Methylvaleric acid              | -0.24  | -9.08  | 8.60  | 0.96 | 0.99 |
| Glycerol                          | -0.16  | -9.22  | 8.90  | 0.97 | 0.99 |
| 2-Hydroxybutyric acid             | -0.14  | -8.95  | 8.66  | 0.97 | 0.99 |
| 2-Desoxy-D-glycero-pentos-3-ulose | 0.077  | -8.76  | 8.92  | 0.99 | 0.99 |
| Quininic acid                     | -0.064 | -8.80  | 8.68  | 0.99 | 0.99 |
| Meso-erythritol                   | 0.052  | -8.76  | 8.87  | 0.99 | 0.99 |

**Electronic Supplementary Material Table 3b: Impact of hypoglycaemic exposure using time below range level 2.** Metabolomics data before and after the completion of the adrenaline infusions of the participants with type 1 diabetes before were assessed using linear mixed-effects model and TBR level 2 as fixed factor. Data are presented as a coefficient with confidence interval. Raw P-values are shown and the adjusted P-values using Benjamini-Hochberg.

| Metabolites                        | Coefficient | 95% Confidence interval |       | P    | P <sub>BH</sub> |
|------------------------------------|-------------|-------------------------|-------|------|-----------------|
|                                    |             | Lower                   | Upper |      |                 |
| N-Acetyl-D-glucosamine             | 37.00       | 10.80                   | 63.30 | 0.01 | 0.52            |
| L-Tryptophan                       | 37.90       | 10.40                   | 65.50 | 0.01 | 0.52            |
| Palmitic acid                      | -34.90      | -62.20                  | -7.67 | 0.01 | 0.52            |
| Oleic acid                         | -32.80      | -59.90                  | -5.71 | 0.02 | 0.52            |
| L-Hydroxyproline                   | -33.60      | -61.40                  | -5.82 | 0.02 | 0.52            |
| Linoleic acid                      | -31.80      | -58.80                  | -4.72 | 0.02 | 0.52            |
| Stearic acid                       | -31.10      | -58.20                  | -4.02 | 0.02 | 0.52            |
| Methyl stearate                    | -29.90      | -56.60                  | -3.18 | 0.03 | 0.52            |
| 3-Hydroxyisovaleric acid           | 30.90       | 3.18                    | 58.50 | 0.03 | 0.52            |
| Arachidonic acid                   | -28.30      | -55.00                  | -1.51 | 0.04 | 0.57            |
| Uric acid                          | -28.60      | -55.70                  | -1.51 | 0.04 | 0.57            |
| Tetradecanoic acid                 | -27.80      | -54.70                  | -0.78 | 0.04 | 0.59            |
| 2-Ketoisocaproic acid              | 28.70       | 0.25                    | 57.20 | 0.05 | 0.60            |
| Octanoic acid                      | -26.90      | -54.30                  | 0.45  | 0.05 | 0.62            |
| Heptadecanoate                     | -26.40      | -54.00                  | 1.26  | 0.06 | 0.66            |
| Methyl linoleate                   | -24.50      | -51.20                  | 2.14  | 0.07 | 0.68            |
| Palmitoleic acid                   | -25.00      | -52.20                  | 2.23  | 0.07 | 0.68            |
| Acetoacetic acid                   | 25.00       | -2.78                   | 52.90 | 0.08 | 0.69            |
| $\alpha$ -Ketoglutaric acid        | 23.60       | -3.25                   | 50.40 | 0.08 | 0.69            |
| Nonanoic acid                      | -23.80      | -50.90                  | 3.34  | 0.09 | 0.69            |
| Dodecanoic acid                    | -21.90      | -49.10                  | 5.34  | 0.12 | 0.88            |
| DL-Pyroglutamic acid               | -22.40      | -50.50                  | 5.80  | 0.12 | 0.88            |
| n-Butylamine                       | -21.00      | -48.60                  | 6.68  | 0.14 | 0.93            |
| Heptanoic acid                     | -20.70      | -48.00                  | 6.64  | 0.14 | 0.93            |
| Glutamic acid                      | 20.10       | -7.37                   | 47.50 | 0.15 | 0.97            |
| 2,5-di-tert-Butyl-1,4-benzoquinone | 19.60       | -7.53                   | 46.70 | 0.16 | 0.97            |
| Decanoic acid                      | -19.00      | -46.10                  | 8.09  | 0.17 | 0.999           |
| Methyl hexadecanoic acid           | -18.20      | -45.20                  | 8.85  | 0.19 | 0.999           |
| Pyruvic acid                       | 17.90       | -9.00                   | 44.80 | 0.19 | 0.999           |
| Parabanic acid                     | 17.90       | -9.03                   | 44.80 | 0.19 | 0.999           |
| 3-Hydroxybutyric acid              | -17.20      | -44.80                  | 10.50 | 0.22 | 0.999           |
| Phosphoric acid                    | 15.90       | -11.20                  | 43.00 | 0.25 | 0.999           |
| Pseudo uridine                     | -15.20      | -42.10                  | 11.60 | 0.27 | 0.999           |
| D-(+)-Trehalose                    | -15.80      | -43.80                  | 12.20 | 0.27 | 0.999           |
| Trehalose                          | -14.90      | -41.50                  | 11.60 | 0.27 | 0.999           |
| 2-Methylglutaric acid              | -15.40      | -42.80                  | 12.10 | 0.27 | 0.999           |
| Malonic acid                       | -15.30      | -43.00                  | 12.40 | 0.28 | 0.999           |
| D-Galactose (1E)                   | 15.00       | -12.30                  | 42.30 | 0.28 | 0.999           |
| 1-Monopalmitin                     | -14.70      | -41.40                  | 12.10 | 0.28 | 0.999           |
| Pyrophosphate                      | 14.50       | -12.20                  | 41.20 | 0.29 | 0.999           |
| 1,3-Propanediol                    | 13.90       | -13.00                  | 40.80 | 0.31 | 0.999           |
| 2-Palmitoylglycerol                | -13.60      | -40.50                  | 13.20 | 0.32 | 0.999           |
| 2-Hydroxypropanoic acid            | 13.40       | -13.50                  | 40.30 | 0.33 | 0.999           |
| Ribitol                            | -13.10      | -40.30                  | 14.10 | 0.34 | 0.999           |
| D-(+)-Galacturonic acid            | 13.10       | -14.30                  | 40.50 | 0.35 | 0.999           |
| Glutamic acid-d5                   | 12.60       | -13.80                  | 39.00 | 0.35 | 0.999           |
| Aminomalonic acid                  | -12.80      | -40.10                  | 14.50 | 0.36 | 0.999           |
| Melibiose                          | 12.10       | -14.50                  | 38.60 | 0.37 | 0.999           |
| Isoleucine                         | 11.60       | -14.80                  | 38.10 | 0.39 | 0.999           |
| $\beta$ -D-Glucopyranose           | 11.90       | -15.30                  | 39.10 | 0.39 | 0.999           |
| L-Norleucine                       | 11.30       | -15.10                  | 37.80 | 0.40 | 0.999           |
| Leucine                            | 10.80       | -15.70                  | 37.30 | 0.42 | 0.999           |

|                                           |        |        |       |      |       |
|-------------------------------------------|--------|--------|-------|------|-------|
| Phosphoric acid 2,3-dihydroxypropyl ester | -10.80 | -37.80 | 16.30 | 0.43 | 0.999 |
| Methionine                                | 10.60  | -16.10 | 37.30 | 0.44 | 0.999 |
| D-Gluconic acid                           | 10.60  | -16.30 | 37.50 | 0.44 | 0.999 |
| Isobutylamine                             | 10.20  | -17.00 | 37.50 | 0.46 | 0.999 |
| β-Tocopherol                              | -8.90  | -35.80 | 18.00 | 0.52 | 0.999 |
| Diethanolamine                            | 9.09   | -18.70 | 36.90 | 0.52 | 0.999 |
| 2-Methyl-6-tert-butylphenol               | -8.93  | -36.40 | 18.60 | 0.52 | 0.999 |
| Glyceryl-glycoside                        | -8.45  | -34.90 | 18.00 | 0.53 | 0.999 |
| Valine-d8                                 | 8.32   | -18.20 | 34.80 | 0.54 | 0.999 |
| Tetradecanol                              | -8.51  | -36.20 | 19.20 | 0.55 | 0.999 |
| D-(-)-Rhamnose                            | -8.01  | -34.90 | 18.90 | 0.56 | 0.999 |
| Succinic acid                             | -7.94  | -34.70 | 18.80 | 0.56 | 0.999 |
| Hypoxanthine                              | 7.75   | -19.80 | 35.30 | 0.58 | 0.999 |
| D-Glucarate                               | -7.25  | -33.90 | 19.40 | 0.59 | 0.999 |
| Citric acid                               | 7.23   | -19.60 | 34.00 | 0.60 | 0.999 |
| Linolenic acid                            | -7.22  | -34.00 | 19.50 | 0.60 | 0.999 |
| Phosphoric acid, monomethyl ester         | 7.23   | -19.60 | 34.00 | 0.60 | 0.999 |
| Levogluconan                              | -7.19  | -33.90 | 19.50 | 0.60 | 0.999 |
| Triethylene glycol                        | -7.16  | -33.80 | 19.50 | 0.60 | 0.999 |
| Succinic acid-d4                          | 6.79   | -19.50 | 33.10 | 0.61 | 0.999 |
| 4,4-Dibromooctafluorobiphenyl             | 6.78   | -19.60 | 33.10 | 0.61 | 0.999 |
| L-α-Aminobutyric acid                     | 6.46   | -20.20 | 33.10 | 0.63 | 0.999 |
| 4-Amino-3-hydroxybutanoic acid            | -6.31  | -32.90 | 20.30 | 0.64 | 0.999 |
| L-Norvaline                               | 6.29   | -20.20 | 32.80 | 0.64 | 0.999 |
| N-Acetylneuraminic acid                   | -6.28  | -32.80 | 20.30 | 0.64 | 0.999 |
| Meso-erythritol                           | 6.26   | -20.40 | 32.90 | 0.64 | 0.999 |
| N-Methyl-DL-alanine                       | 6.24   | -20.40 | 32.90 | 0.65 | 0.999 |
| Benzoic acid                              | 6.48   | -21.40 | 34.30 | 0.65 | 0.999 |
| D-Glucose                                 | 6.22   | -20.90 | 33.30 | 0.65 | 0.999 |
| Butyl hexadecanoic acid                   | -6.36  | -34.30 | 21.50 | 0.65 | 0.999 |
| D-Glucose 6-phosphate                     | 6.37   | -21.60 | 34.40 | 0.66 | 0.999 |
| L-Histidine                               | 6.05   | -20.80 | 32.90 | 0.66 | 0.999 |
| Putrescine                                | 5.86   | -21.00 | 32.70 | 0.67 | 0.999 |
| L-2-Aminobutyric acid                     | 5.77   | -20.90 | 32.50 | 0.67 | 0.999 |
| 1-Dodecanol                               | -5.77  | -33.10 | 21.60 | 0.68 | 0.999 |
| L-5-Oxoproline                            | -5.67  | -32.60 | 21.20 | 0.68 | 0.999 |
| Urea                                      | -5.24  | -32.00 | 21.50 | 0.70 | 0.999 |
| L-Arginine                                | 4.91   | -21.10 | 31.00 | 0.71 | 0.999 |
| 1,6-Anhydroglucose                        | -4.84  | -31.30 | 21.60 | 0.72 | 0.999 |
| Phenylalanine                             | 4.78   | -22.00 | 31.50 | 0.73 | 0.999 |
| Taurine                                   | -4.98  | -33.00 | 23.00 | 0.73 | 0.999 |
| Alanine                                   | 4.72   | -22.10 | 31.50 | 0.73 | 0.999 |
| Ornithine                                 | -4.61  | -31.10 | 21.80 | 0.73 | 0.999 |
| α-D-(-)-Tagatopyranose                    | 4.79   | -23.50 | 33.10 | 0.74 | 0.999 |
| p-Cresol                                  | -4.46  | -32.20 | 23.30 | 0.75 | 0.999 |
| Glutamine                                 | 4.29   | -22.70 | 31.30 | 0.75 | 0.999 |
| L-(-)-Arabitol                            | 4.15   | -21.90 | 30.20 | 0.75 | 0.999 |
| 2,3-Dihydroxybutanoic acid                | -4.25  | -31.10 | 22.60 | 0.76 | 0.999 |
| Aspartic acid                             | 3.95   | -23.30 | 31.20 | 0.78 | 0.999 |
| Phenoxyacetic acid                        | 3.86   | -22.90 | 30.60 | 0.78 | 0.999 |
| Oxalic acid                               | 3.96   | -23.60 | 31.50 | 0.78 | 0.999 |
| Ribonic acid                              | -3.82  | -30.40 | 22.70 | 0.78 | 0.999 |
| d-Galactose (1Z)                          | -3.82  | -30.40 | 22.80 | 0.78 | 0.999 |
| L-Pipecolic acid                          | -3.87  | -30.90 | 23.20 | 0.78 | 0.999 |
| Serine                                    | 3.80   | -23.10 | 30.70 | 0.78 | 0.999 |
| D-Arabitol                                | 3.72   | -23.30 | 30.70 | 0.79 | 0.999 |
| 3-Indolepropionic acid                    | -3.58  | -30.10 | 23.00 | 0.79 | 0.999 |
| Malic acid                                | -3.68  | -31.00 | 23.70 | 0.79 | 0.999 |
| D-(-)-Tagatofuranose                      | 3.62   | -24.10 | 31.40 | 0.80 | 0.999 |



|                                   |       |        |       |      |       |
|-----------------------------------|-------|--------|-------|------|-------|
| Threonine                         | 3.47  | -23.40 | 30.30 | 0.80 | 0.999 |
| Ketovaline                        | -3.42 | -30.70 | 23.80 | 0.81 | 0.999 |
| Tryptophan                        | 3.24  | -24.10 | 30.60 | 0.82 | 0.999 |
| D-(-)-Lyxofuranose                | 3.21  | -23.90 | 30.30 | 0.82 | 0.999 |
| Proline                           | 3.18  | -23.80 | 30.20 | 0.82 | 0.999 |
| Valine                            | -3.09 | -29.40 | 23.20 | 0.82 | 0.999 |
| Cholesterol                       | -3.18 | -30.50 | 24.20 | 0.82 | 0.999 |
| Cysteine                          | -3.02 | -30.00 | 24.00 | 0.83 | 0.999 |
| Glyceric acid                     | -2.93 | -29.60 | 23.70 | 0.83 | 0.999 |
| Glycolic acid                     | 2.90  | -23.50 | 29.30 | 0.83 | 0.999 |
| $\alpha$ -Tocopherol              | -2.97 | -30.10 | 24.20 | 0.83 | 0.999 |
| 2-Keto-3-methylpentanoic acid     | 3.04  | -25.00 | 31.00 | 0.83 | 0.999 |
| 4-Methylvaleric acid              | 2.86  | -23.90 | 29.60 | 0.83 | 0.999 |
| L-(-)-Sorbitol                    | 2.49  | -24.00 | 29.00 | 0.85 | 0.999 |
| Ibuprofen                         | 2.36  | -24.30 | 29.00 | 0.86 | 0.999 |
| Fumaric acid                      | -2.20 | -29.70 | 25.30 | 0.88 | 0.999 |
| Sorbitol                          | -2.05 | -29.50 | 25.30 | 0.88 | 0.999 |
| Tyrosine                          | -1.92 | -28.40 | 24.50 | 0.89 | 0.999 |
| Dihydrouracil                     | -1.84 | -28.40 | 24.70 | 0.89 | 0.999 |
| $\beta$ -Alanine                  | -1.82 | -28.50 | 24.90 | 0.89 | 0.999 |
| Quinic acid                       | 1.80  | -24.70 | 28.30 | 0.89 | 0.999 |
| 2-Hydroxypyridine                 | 1.77  | -25.70 | 29.20 | 0.90 | 0.999 |
| n-Propylamine                     | 1.67  | -25.00 | 28.30 | 0.90 | 0.999 |
| Nonacosane                        | -1.67 | -29.60 | 26.20 | 0.91 | 0.999 |
| Glycine                           | -1.58 | -28.20 | 25.00 | 0.91 | 0.999 |
| D-Fucitol                         | 1.53  | -25.10 | 28.20 | 0.91 | 0.999 |
| Docosaheptaenoic acid             | -1.52 | -28.20 | 25.20 | 0.91 | 0.999 |
| Lysine                            | 1.45  | -25.10 | 28.00 | 0.92 | 0.999 |
| Ethanolamine                      | 1.25  | -25.60 | 28.10 | 0.93 | 0.999 |
| Glycerol                          | 1.16  | -26.20 | 28.60 | 0.93 | 0.999 |
| Phosphonoacetate                  | -1.14 | -28.70 | 26.40 | 0.94 | 0.999 |
| 2-Desoxy-D-glycero-pentos-3-ulose | 0.99  | -25.80 | 27.80 | 0.94 | 0.999 |
| 2-Hydroxybutyric acid             | -0.93 | -27.60 | 25.70 | 0.95 | 0.999 |
| Acetylsalicylic acid              | -0.91 | -27.80 | 25.90 | 0.95 | 0.999 |
| D-(+)-Xylose                      | 0.88  | -26.00 | 27.80 | 0.95 | 0.999 |
| Diethylene glycol                 | -0.84 | -27.90 | 26.20 | 0.95 | 0.999 |
| Ketoisoleucine                    | 0.81  | -27.60 | 29.20 | 0.96 | 0.999 |
| L-Threonic acid                   | 0.73  | -25.80 | 27.20 | 0.96 | 0.999 |
| (2E)-Decenoyl-ACP                 | 0.67  | -26.10 | 27.40 | 0.96 | 0.999 |
| 3-Indoleacetic acid               | -0.65 | -27.40 | 26.10 | 0.96 | 0.999 |
| O-Phosphoethanolamine             | 0.63  | -26.20 | 27.50 | 0.96 | 0.999 |
| 3-Pyridinol                       | -0.56 | -27.70 | 26.60 | 0.97 | 0.999 |
| Heptadecanoic acid-d33            | -0.48 | -26.90 | 25.90 | 0.97 | 0.999 |
| Glyoxylic acid                    | -0.39 | -27.30 | 26.60 | 0.98 | 0.999 |
| Methylmalonic acid                | -0.34 | -27.10 | 26.50 | 0.98 | 0.999 |
| Hydroquinone                      | -0.31 | -26.50 | 25.90 | 0.98 | 0.999 |
| Eicosapentaenoic acid             | -0.26 | -26.80 | 26.30 | 0.99 | 0.999 |
| 1,5-Anhydrohexitol                | -0.23 | -27.10 | 26.60 | 0.99 | 0.999 |
| Myo-inositol                      | 0.14  | -26.50 | 26.80 | 0.99 | 0.999 |
| Maltose                           | 0.04  | -27.00 | 27.10 | 1.00 | 0.999 |
| 3-Hydroxyicosatetraenoyl-CoA      | -0.02 | -28.00 | 28.00 | 1.00 | 0.999 |

---

**Electronic Supplementary Material Table 3c: Impact of hypoglycaemic exposure using hypoglycaemic events per week level 1.** Metabolomics data before and after the completion of the adrenaline infusions of the participants with type 1 diabetes before were assessed using linear mixed-effects model and HEPW level 1 as fixed factor. Data are presented as a coefficient with confidence interval. Raw P-values are shown and the adjusted P-values using Benjamini-Hochberg.

| Metabolites                               | Coefficient | 95% Confidence interval |        | P       | P <sub>BH</sub> |
|-------------------------------------------|-------------|-------------------------|--------|---------|-----------------|
|                                           |             | Lower                   | Upper  |         |                 |
| DL-Pyroglutamic acid                      | -0.23       | -0.33                   | -0.13  | < 0.001 | 0.004           |
| Octanoic acid                             | -0.16       | -0.26                   | -0.058 | 0.002   | 0.20            |
| Nonacosane                                | -0.16       | -0.26                   | -0.050 | 0.004   | 0.20            |
| Phosphonoacetate                          | -0.15       | -0.25                   | -0.046 | 0.005   | 0.20            |
| L-Pipecolic acid                          | -0.14       | -0.24                   | -0.035 | 0.01    | 0.23            |
| 2-Methylglutaric acid                     | -0.14       | -0.24                   | -0.035 | 0.01    | 0.23            |
| D-Glucose 6-phosphate                     | -0.14       | -0.25                   | -0.034 | 0.01    | 0.23            |
| Ketovaline                                | -0.13       | -0.23                   | -0.026 | 0.01    | 0.28            |
| Cholesterol                               | -0.13       | -0.23                   | -0.024 | 0.02    | 0.28            |
| Nonanoic acid                             | -0.12       | -0.22                   | -0.018 | 0.02    | 0.31            |
| Aminomalonic acid                         | -0.12       | -0.22                   | -0.018 | 0.02    | 0.31            |
| 2-Hydroxypyridine                         | -0.12       | -0.22                   | -0.014 | 0.03    | 0.31            |
| Fumaric acid                              | -0.12       | -0.22                   | -0.014 | 0.03    | 0.31            |
| Phosphoric acid 2,3-dihydroxypropyl ester | -0.11       | -0.22                   | -0.012 | 0.03    | 0.31            |
| 3-Hydroxyisovaleric acid                  | 0.12        | 0.01                    | 0.22   | 0.03    | 0.31            |
| Ribitol                                   | -0.11       | -0.21                   | -0.009 | 0.03    | 0.31            |
| Glutamic acid                             | 0.11        | 0.01                    | 0.22   | 0.03    | 0.31            |
| Methyl linoleate                          | -0.11       | -0.21                   | -0.008 | 0.03    | 0.31            |
| L-Tryptophan                              | 0.11        | 0.01                    | 0.22   | 0.04    | 0.31            |
| β-Tocopherol                              | -0.11       | -0.21                   | -0.005 | 0.04    | 0.31            |
| Linoleic acid                             | -0.11       | -0.21                   | -0.004 | 0.04    | 0.31            |
| Ethanolamine                              | -0.11       | -0.21                   | -0.003 | 0.04    | 0.31            |
| α-Tocopherol                              | -0.11       | -0.21                   | -0.003 | 0.04    | 0.31            |
| 2-Methyl-6-tert-butylphenol               | -0.10       | -0.21                   | 0.001  | 0.05    | 0.35            |
| D-(-)-Rhamnose                            | -0.10       | -0.20                   | 0.005  | 0.06    | 0.38            |
| Heptanoic acid                            | -0.10       | -0.20                   | 0.005  | 0.06    | 0.38            |
| L-Hydroxyproline                          | -0.10       | -0.21                   | 0.006  | 0.07    | 0.38            |
| Stearic acid                              | -0.10       | -0.20                   | 0.007  | 0.07    | 0.38            |
| Maltose                                   | -0.095      | -0.20                   | 0.008  | 0.07    | 0.39            |
| Methyl hexadecanoic acid                  | -0.092      | -0.20                   | 0.010  | 0.08    | 0.40            |
| L-5-Oxoproline                            | -0.091      | -0.19                   | 0.010  | 0.08    | 0.40            |
| Pseudo uridine                            | -0.091      | -0.19                   | 0.011  | 0.08    | 0.40            |
| N-Acetyl-D-glucosamine                    | 0.089       | -0.01                   | 0.19   | 0.08    | 0.41            |
| Methyl stearate                           | -0.089      | -0.19                   | 0.013  | 0.09    | 0.41            |
| 3-Hydroxyicosatetraenoyl-CoA              | -0.092      | -0.20                   | 0.014  | 0.09    | 0.41            |
| Glyoxylic acid                            | -0.086      | -0.19                   | 0.016  | 0.10    | 0.44            |
| Decanoic acid                             | -0.087      | -0.19                   | 0.017  | 0.10    | 0.44            |
| Palmitic acid                             | -0.086      | -0.19                   | 0.018  | 0.11    | 0.45            |
| Proline                                   | -0.080      | -0.18                   | 0.022  | 0.12    | 0.51            |
| 1-Monopalmitin                            | -0.077      | -0.18                   | 0.023  | 0.13    | 0.52            |
| Methylmalonic acid                        | -0.078      | -0.18                   | 0.024  | 0.13    | 0.52            |
| d-Glucose                                 | -0.078      | -0.18                   | 0.025  | 0.14    | 0.52            |
| α-D-(-)-Tagatopyranose                    | -0.082      | -0.19                   | 0.027  | 0.14    | 0.52            |
| Isobutylamine                             | -0.078      | -0.18                   | 0.026  | 0.14    | 0.52            |
| Decenoyl-ACP                              | -0.074      | -0.18                   | 0.027  | 0.15    | 0.54            |
| Putrescine                                | -0.072      | -0.17                   | 0.029  | 0.16    | 0.54            |
| Oxalic acid                               | -0.074      | -0.18                   | 0.031  | 0.16    | 0.54            |
| n-Propylamine                             | -0.071      | -0.17                   | 0.030  | 0.17    | 0.54            |
| Sorbitol                                  | -0.073      | -0.18                   | 0.031  | 0.17    | 0.54            |
| Uric acid                                 | -0.072      | -0.18                   | 0.032  | 0.17    | 0.54            |
| D-Fucitol                                 | -0.069      | -0.17                   | 0.031  | 0.17    | 0.54            |

|                                |        |        |       |      |      |
|--------------------------------|--------|--------|-------|------|------|
| 3-Pyridinol                    | -0.071 | -0.17  | 0.032 | 0.18 | 0.54 |
| D-Galactose (1Z)               | -0.069 | -0.17  | 0.032 | 0.18 | 0.54 |
| D-Gluconic acid                | -0.068 | -0.17  | 0.034 | 0.19 | 0.57 |
| p-Cresol                       | -0.070 | -0.18  | 0.036 | 0.19 | 0.57 |
| Glycolic acid                  | -0.065 | -0.16  | 0.035 | 0.20 | 0.57 |
| Alanine                        | -0.066 | -0.17  | 0.036 | 0.20 | 0.57 |
| 2-Palmitoylglycerol            | -0.066 | -0.17  | 0.036 | 0.20 | 0.57 |
| D-(+)-Xylose                   | -0.065 | -0.17  | 0.037 | 0.21 | 0.57 |
| Phosphoric acid                | -0.065 | -0.17  | 0.038 | 0.21 | 0.57 |
| Oleic acid                     | -0.066 | -0.17  | 0.039 | 0.22 | 0.57 |
| N-Acetylneuraminic acid        | -0.063 | -0.16  | 0.037 | 0.22 | 0.57 |
| Aspartic acid                  | 0.064  | -0.040 | 0.17  | 0.22 | 0.57 |
| Tryptophan                     | 0.064  | -0.040 | 0.17  | 0.23 | 0.57 |
| Dodecanoic acid                | -0.064 | -0.17  | 0.041 | 0.23 | 0.57 |
| D-(+)-Trehalose                | -0.065 | -0.17  | 0.042 | 0.23 | 0.57 |
| 2,3-Dihydroxybutanoic acid     | -0.061 | -0.16  | 0.040 | 0.24 | 0.57 |
| 3-Indoleacetic acid            | -0.060 | -0.16  | 0.041 | 0.25 | 0.58 |
| Eicosapentaenoic acid          | -0.058 | -0.16  | 0.042 | 0.25 | 0.58 |
| Butyl hexadecanoic acid        | 0.061  | -0.045 | 0.17  | 0.26 | 0.58 |
| Parabanic acid                 | -0.059 | -0.16  | 0.044 | 0.26 | 0.58 |
| Trehalose                      | -0.057 | -0.16  | 0.043 | 0.26 | 0.58 |
| D-Galactose (1E)               | 0.059  | -0.045 | 0.16  | 0.26 | 0.58 |
| 3-Indolepropionic acid         | -0.057 | -0.16  | 0.043 | 0.26 | 0.58 |
| Serine                         | -0.057 | -0.16  | 0.044 | 0.27 | 0.58 |
| Linolenic acid                 | -0.057 | -0.16  | 0.045 | 0.27 | 0.58 |
| Dihydrouracil                  | -0.055 | -0.16  | 0.046 | 0.29 | 0.58 |
| Ribonic acid                   | -0.054 | -0.15  | 0.046 | 0.29 | 0.58 |
| D-Glucarate                    | -0.054 | -0.16  | 0.046 | 0.29 | 0.58 |
| Arachidonic acid               | -0.055 | -0.16  | 0.047 | 0.29 | 0.58 |
| Tetradecanol                   | -0.057 | -0.16  | 0.049 | 0.29 | 0.58 |
| Glutamic acid-d5               | 0.053  | -0.047 | 0.15  | 0.30 | 0.58 |
| Glycine                        | -0.054 | -0.15  | 0.047 | 0.30 | 0.58 |
| Malic acid                     | -0.055 | -0.16  | 0.049 | 0.30 | 0.58 |
| D-Arabitol                     | -0.051 | -0.15  | 0.051 | 0.33 | 0.61 |
| Ibuprofen                      | 0.050  | -0.051 | 0.15  | 0.33 | 0.61 |
| N-Methyl-DL-alanine            | -0.050 | -0.15  | 0.051 | 0.33 | 0.61 |
| Phenoxyacetic acid             | -0.049 | -0.15  | 0.052 | 0.34 | 0.61 |
| Levogluconic acid              | -0.049 | -0.15  | 0.052 | 0.34 | 0.61 |
| L-2-Aminobutyric acid          | -0.049 | -0.15  | 0.053 | 0.35 | 0.61 |
| Myo-inositol                   | -0.048 | -0.15  | 0.053 | 0.35 | 0.61 |
| Hydroquinone                   | -0.047 | -0.15  | 0.052 | 0.35 | 0.61 |
| L- $\alpha$ -Aminobutyric acid | -0.048 | -0.15  | 0.053 | 0.35 | 0.61 |
| Threonine                      | -0.048 | -0.15  | 0.054 | 0.36 | 0.61 |
| Glycerol-3-phosphate           | -0.047 | -0.15  | 0.053 | 0.36 | 0.61 |
| Hypoxanthine                   | 0.049  | -0.056 | 0.15  | 0.36 | 0.61 |
| Glutamine                      | 0.046  | -0.055 | 0.15  | 0.37 | 0.61 |
| Palmitoleic acid               | 0.048  | -0.057 | 0.15  | 0.37 | 0.61 |
| 2-Ketoglutaric acid            | -0.050 | -0.16  | 0.061 | 0.37 | 0.61 |
| meso-Erythritol                | -0.045 | -0.15  | 0.055 | 0.38 | 0.61 |
| Acetoacetic acid               | 0.047  | -0.060 | 0.16  | 0.38 | 0.61 |
| L-Histidine                    | 0.044  | -0.057 | 0.15  | 0.39 | 0.61 |
| L-Norvaline                    | -0.044 | -0.14  | 0.057 | 0.39 | 0.61 |
| D-(-)-Tagatofuranose           | -0.046 | -0.15  | 0.060 | 0.40 | 0.61 |
| Lysine                         | 0.043  | -0.057 | 0.14  | 0.40 | 0.61 |
| Triethylene glycol             | -0.044 | -0.15  | 0.058 | 0.40 | 0.61 |
| Glyceric acid                  | -0.043 | -0.14  | 0.058 | 0.40 | 0.61 |
| 1,6-Anhydroglucose             | -0.039 | -0.14  | 0.061 | 0.45 | 0.66 |
| $\beta$ -Alanine               | -0.039 | -0.14  | 0.062 | 0.45 | 0.66 |
| 4-Amino-3-hydroxybutanoic acid | -0.039 | -0.14  | 0.062 | 0.45 | 0.66 |
| Taurine                        | 0.040  | -0.067 | 0.15  | 0.46 | 0.67 |

|                                    |        |        |       |      |       |
|------------------------------------|--------|--------|-------|------|-------|
| Cysteine                           | 0.041  | -0.069 | 0.15  | 0.47 | 0.67  |
| Pyruvic acid                       | -0.037 | -0.14  | 0.065 | 0.47 | 0.67  |
| Heptadecanoic acid-d33             | 0.036  | -0.063 | 0.14  | 0.47 | 0.67  |
| 1,3-Propanediol                    | -0.037 | -0.14  | 0.065 | 0.48 | 0.67  |
| $\alpha$ -Ketoglutaric acid        | 0.038  | -0.068 | 0.14  | 0.48 | 0.67  |
| L-Threonic acid                    | -0.035 | -0.14  | 0.06  | 0.49 | 0.67  |
| Malonic acid                       | 0.038  | -0.069 | 0.14  | 0.49 | 0.67  |
| Phosphoric acid, monomethyl ester  | -0.035 | -0.14  | 0.067 | 0.50 | 0.68  |
| 2-Keto-3-methylpentanoic acid      | -0.035 | -0.14  | 0.073 | 0.53 | 0.71  |
| Ketoisoleucine                     | 0.035  | -0.075 | 0.14  | 0.53 | 0.71  |
| 4,4-Dibromooctafluorobiphenyl      | 0.029  | -0.069 | 0.13  | 0.56 | 0.74  |
| 2-Hydroxypropanoic acid            | -0.030 | -0.13  | 0.073 | 0.57 | 0.75  |
| Docosaheptaenoic acid              | -0.028 | -0.13  | 0.074 | 0.59 | 0.77  |
| Ornithine                          | -0.027 | -0.13  | 0.072 | 0.59 | 0.77  |
| D-(-)-Lyxofuranose                 | 0.027  | -0.076 | 0.13  | 0.60 | 0.77  |
| Heptadecanoate                     | 0.028  | -0.079 | 0.14  | 0.61 | 0.77  |
| 1-Dodecanol                        | -0.027 | -0.13  | 0.078 | 0.61 | 0.77  |
| Benzoic acid                       | -0.027 | -0.13  | 0.080 | 0.62 | 0.78  |
| L-(-)-Sorbitol                     | -0.023 | -0.12  | 0.077 | 0.65 | 0.81  |
| 4-Methylvaleric acid               | -0.023 | -0.12  | 0.078 | 0.66 | 0.81  |
| 2,5-di-tert-Butyl-1,4-benzoquinone | -0.021 | -0.13  | 0.082 | 0.69 | 0.83  |
| Pyrophosphate                      | 0.021  | -0.081 | 0.12  | 0.69 | 0.83  |
| Leucine                            | -0.020 | -0.12  | 0.081 | 0.70 | 0.83  |
| Tetradecanoic acid                 | -0.020 | -0.13  | 0.084 | 0.70 | 0.83  |
| n-Butylamine                       | 0.021  | -0.086 | 0.13  | 0.70 | 0.83  |
| Succinic acid                      | -0.019 | -0.12  | 0.082 | 0.71 | 0.84  |
| L-(-)-Arabitol                     | -0.016 | -0.12  | 0.083 | 0.75 | 0.87  |
| Citric acid                        | -0.017 | -0.12  | 0.085 | 0.75 | 0.87  |
| D-(+)-Galacturonic acid            | -0.017 | -0.12  | 0.088 | 0.76 | 0.87  |
| $\beta$ -D-Glucopyranose           | -0.016 | -0.12  | 0.088 | 0.76 | 0.88  |
| Quininic acid                      | -0.015 | -0.11  | 0.085 | 0.77 | 0.88  |
| Diethanolamine                     | -0.015 | -0.12  | 0.091 | 0.78 | 0.88  |
| Diethylene glycol                  | 0.015  | -0.088 | 0.12  | 0.78 | 0.88  |
| Methionine                         | 0.013  | -0.088 | 0.11  | 0.80 | 0.89  |
| 1,5-Anhydrohexitol                 | -0.013 | -0.12  | 0.089 | 0.80 | 0.89  |
| 2-Desoxy-D-glycero-pentos-3-ulose  | -0.012 | -0.11  | 0.089 | 0.81 | 0.89  |
| Urea                               | 0.012  | -0.089 | 0.11  | 0.81 | 0.89  |
| Valine                             | -0.011 | -0.11  | 0.089 | 0.83 | 0.90  |
| Tyrosine                           | 0.011  | -0.089 | 0.11  | 0.83 | 0.90  |
| L-Norleucine                       | -0.010 | -0.11  | 0.091 | 0.85 | 0.91  |
| Acetylsalicylic acid               | -0.010 | -0.11  | 0.093 | 0.85 | 0.91  |
| Phenylalanine                      | -0.009 | -0.11  | 0.093 | 0.87 | 0.91  |
| Succinic acid-d4                   | 0.009  | -0.090 | 0.11  | 0.87 | 0.91  |
| Glycerol                           | -0.008 | -0.11  | 0.10  | 0.88 | 0.91  |
| 3-Hydroxybutyric acid              | 0.008  | -0.10  | 0.12  | 0.88 | 0.91  |
| Melibiose                          | -0.004 | -0.11  | 0.10  | 0.94 | 0.97  |
| O-Phosphoethanolamine              | 0.003  | -0.10  | 0.11  | 0.96 | 0.98  |
| Isoleucine                         | -0.002 | -0.10  | 0.10  | 0.97 | 0.98  |
| Valine-d8                          | -0.001 | -0.10  | 0.10  | 0.98 | 0.995 |
| L-Arginine                         | -0.001 | -0.10  | 0.10  | 0.99 | 0.996 |
| 2-Hydroxybutyric acid              | 0.0002 | -0.10  | 0.10  | 1.00 | 0.997 |

**Electronic Supplementary Material Table 3d: Impact of hypoglycemic exposure using hypoglycemic events per week level 2.** Metabolomics data before and after the completion of the adrenaline infusions of the participants with type 1 diabetes before were assessed using linear mixed-effects model and hypoglycemic events per week level 2 as fixed factor. Data are presented as a coefficient with confidence interval. Raw P-values are shown and the adjusted P-values using Benjamini-Hochberg.

| Metabolites                               | Coefficient | 95% Confidence interval |        | P    | P <sub>BH</sub> |
|-------------------------------------------|-------------|-------------------------|--------|------|-----------------|
|                                           |             | Lower                   | Upper  |      |                 |
| n-Butylamine                              | -0.22       | -0.38                   | -0.061 | 0.01 | 0.35            |
| Palmitic acid                             | -0.22       | -0.38                   | -0.059 | 0.01 | 0.35            |
| Methyl stearate                           | -0.21       | -0.36                   | -0.046 | 0.01 | 0.35            |
| N-Acetyl-D-glucosamine                    | 0.20        | 0.041                   | 0.36   | 0.01 | 0.35            |
| 3-Hydroxyisovaleric acid                  | 0.20        | 0.039                   | 0.36   | 0.02 | 0.35            |
| L-Tryptophan                              | 0.20        | 0.037                   | 0.36   | 0.02 | 0.35            |
| Linoleic acid                             | -0.20       | -0.36                   | -0.036 | 0.02 | 0.35            |
| Oleic acid                                | -0.20       | -0.36                   | -0.035 | 0.02 | 0.35            |
| Stearic acid                              | -0.19       | -0.35                   | -0.029 | 0.02 | 0.36            |
| Octanoic acid                             | -0.19       | -0.35                   | -0.027 | 0.02 | 0.36            |
| Methyl linoleate                          | -0.18       | -0.34                   | -0.023 | 0.02 | 0.37            |
| Methyl hexadecanoic acid                  | -0.18       | -0.34                   | -0.020 | 0.03 | 0.37            |
| DL-Pyroglutamic acid                      | -0.17       | -0.33                   | -0.006 | 0.04 | 0.50            |
| Heptanoic acid                            | -0.17       | -0.33                   | -0.005 | 0.04 | 0.50            |
| Tetradecanoic acid                        | -0.16       | -0.32                   | -0.001 | 0.05 | 0.53            |
| Nonanoic acid                             | -0.16       | -0.32                   | 0.002  | 0.05 | 0.53            |
| Uric acid                                 | -0.16       | -0.32                   | 0.004  | 0.06 | 0.53            |
| Glutamic acid                             | 0.15        | -0.011                  | 0.31   | 0.07 | 0.59            |
| L-Hydroxyproline                          | -0.15       | -0.32                   | 0.012  | 0.07 | 0.59            |
| Taurine                                   | 0.15        | -0.02                   | 0.31   | 0.08 | 0.62            |
| Arachidonic acid                          | -0.14       | -0.30                   | 0.017  | 0.08 | 0.62            |
| α-Ketoglutaric acid                       | 0.14        | -0.025                  | 0.30   | 0.10 | 0.69            |
| Palmitoleic acid                          | -0.14       | -0.30                   | 0.025  | 0.10 | 0.69            |
| Pyruvic acid                              | 0.13        | -0.031                  | 0.29   | 0.11 | 0.77            |
| Fumaric acid                              | -0.13       | -0.29                   | 0.037  | 0.13 | 0.84            |
| Decanoic acid                             | -0.12       | -0.28                   | 0.043  | 0.15 | 0.94            |
| Dodecanoic acid                           | -0.12       | -0.28                   | 0.045  | 0.16 | 0.95            |
| Aminomalonic acid                         | -0.11       | -0.27                   | 0.049  | 0.17 | 0.99            |
| 2-Methyl-6-tert-butylphenol               | -0.11       | -0.27                   | 0.051  | 0.18 | 0.99            |
| 2-Methylglutaric acid                     | -0.11       | -0.27                   | 0.053  | 0.19 | 0.99            |
| D-(+)-Trehalose                           | -0.11       | -0.27                   | 0.054  | 0.19 | 0.99            |
| Ribitol                                   | -0.10       | -0.26                   | 0.059  | 0.22 | 0.99            |
| 2-Ketoisocaproic acid                     | 0.10        | -0.061                  | 0.27   | 0.22 | 0.99            |
| β-Tocopherol                              | -0.10       | -0.26                   | 0.063  | 0.23 | 0.99            |
| Heptadecanoate                            | -0.10       | -0.26                   | 0.067  | 0.25 | 0.99            |
| 1-Monopalmitin                            | -0.093      | -0.25                   | 0.066  | 0.25 | 0.99            |
| Acetylsalicylic acid                      | -0.092      | -0.25                   | 0.068  | 0.26 | 0.99            |
| 2-Palmitoylglycerol                       | -0.092      | -0.25                   | 0.068  | 0.26 | 0.99            |
| Phosphoric acid 2,3-dihydroxypropyl ester | -0.090      | -0.25                   | 0.070  | 0.27 | 0.99            |
| Glutamic acid-d5                          | 0.089       | -0.069                  | 0.25   | 0.27 | 0.99            |
| Diethylene glycol                         | -0.090      | -0.25                   | 0.070  | 0.27 | 0.99            |
| Pseudo uridine                            | -0.089      | -0.25                   | 0.070  | 0.27 | 0.99            |
| Pyrophosphate                             | 0.087       | -0.073                  | 0.25   | 0.29 | 0.99            |
| 3-Hydroxybutyric acid                     | -0.086      | -0.25                   | 0.076  | 0.30 | 0.99            |
| Trehalose                                 | -0.084      | -0.24                   | 0.075  | 0.30 | 0.99            |
| Phosphonoacetate                          | -0.083      | -0.25                   | 0.08   | 0.31 | 0.99            |
| Ketoisoleucine                            | 0.082       | -0.083                  | 0.25   | 0.33 | 0.99            |
| L-5-Oxoproline                            | -0.079      | -0.24                   | 0.081  | 0.33 | 0.99            |
| Ketovaline                                | -0.078      | -0.24                   | 0.083  | 0.34 | 0.99            |
| Cholesterol                               | -0.077      | -0.24                   | 0.084  | 0.35 | 0.99            |
| 2-Hydroxypyridine                         | -0.075      | -0.24                   | 0.086  | 0.36 | 0.99            |

|                                    |        |        |       |      |      |
|------------------------------------|--------|--------|-------|------|------|
| 2,5-di-tert-Butyl-1,4-benzoquinone | 0.074  | -0.087 | 0.23  | 0.37 | 0.99 |
| Malonic acid                       | -0.073 | -0.24  | 0.089 | 0.38 | 0.99 |
| Cysteine                           | -0.075 | -0.24  | 0.091 | 0.38 | 0.99 |
| L-Pipecolic acid                   | -0.071 | -0.23  | 0.090 | 0.39 | 0.99 |
| Ibuprofen                          | 0.069  | -0.09  | 0.23  | 0.39 | 0.99 |
| Glyoxylic acid                     | -0.070 | -0.23  | 0.090 | 0.39 | 0.99 |
| Tetradecanol                       | -0.070 | -0.23  | 0.092 | 0.40 | 0.99 |
| $\alpha$ -Tocopherol               | -0.069 | -0.23  | 0.092 | 0.40 | 0.99 |
| Linolenic acid                     | -0.065 | -0.23  | 0.094 | 0.42 | 0.99 |
| Methylmalonic acid                 | -0.065 | -0.23  | 0.094 | 0.42 | 0.99 |
| D-Galactose (1E)                   | 0.065  | -0.10  | 0.23  | 0.43 | 0.99 |
| Aspartic acid                      | 0.065  | -0.10  | 0.23  | 0.43 | 0.99 |
| Levoglucofan                       | -0.063 | -0.22  | 0.10  | 0.44 | 0.99 |
| p-Cresol                           | -0.063 | -0.23  | 0.10  | 0.44 | 0.99 |
| 2,3-Dihydroxybutanoic acid         | -0.059 | -0.22  | 0.10  | 0.47 | 0.99 |
| Melibiose                          | 0.057  | -0.10  | 0.22  | 0.48 | 0.99 |
| 1-Dodecanol                        | -0.057 | -0.22  | 0.10  | 0.49 | 0.99 |
| $\beta$ -Alanine                   | -0.054 | -0.21  | 0.11  | 0.50 | 0.99 |
| Diethanolamine                     | 0.056  | -0.11  | 0.22  | 0.50 | 0.99 |
| 2-Desoxy-D-glycero-pentos-3-ulose  | -0.053 | -0.21  | 0.11  | 0.51 | 0.99 |
| O-Phosphoethanolamine              | 0.053  | -0.11  | 0.21  | 0.52 | 0.99 |
| Malic acid                         | -0.053 | -0.21  | 0.11  | 0.52 | 0.99 |
| Glyceryl-glycoside                 | -0.052 | -0.21  | 0.11  | 0.52 | 0.99 |
| Parabanic acid                     | 0.052  | -0.11  | 0.21  | 0.52 | 0.99 |
| D-(-)-Lyxofuranose                 | 0.052  | -0.11  | 0.21  | 0.53 | 0.99 |
| N-Acetylneuraminic acid            | -0.051 | -0.21  | 0.11  | 0.53 | 0.99 |
| $\beta$ -D-Glucopyranose           | 0.052  | -0.11  | 0.21  | 0.53 | 0.99 |
| D-Galactose (1Z)                   | -0.050 | -0.21  | 0.11  | 0.54 | 0.99 |
| D-(+)-Galacturonic acid            | 0.051  | -0.11  | 0.21  | 0.54 | 0.99 |
| Hypoxanthine                       | 0.048  | -0.11  | 0.21  | 0.56 | 0.99 |
| 1,3-Propanediol                    | 0.046  | -0.11  | 0.21  | 0.57 | 0.99 |
| Phosphoric acid                    | 0.045  | -0.12  | 0.21  | 0.58 | 0.99 |
| Nonacosane                         | -0.045 | -0.21  | 0.12  | 0.59 | 0.99 |
| Valine-d8                          | 0.044  | -0.12  | 0.20  | 0.59 | 0.99 |
| Acetoacetic acid                   | 0.045  | -0.12  | 0.21  | 0.59 | 0.99 |
| Eicosapentaenoic acid              | -0.043 | -0.20  | 0.12  | 0.60 | 0.99 |
| Decenoyl-ACP                       | -0.043 | -0.20  | 0.12  | 0.60 | 0.99 |
| Isoleucine                         | 0.041  | -0.12  | 0.20  | 0.61 | 0.99 |
| D-(-)-Rhamnose                     | -0.041 | -0.20  | 0.12  | 0.62 | 0.99 |
| 4-amino-3-hydroxybutanoic acid     | -0.040 | -0.20  | 0.12  | 0.62 | 0.99 |
| Dihydrouracil                      | -0.039 | -0.20  | 0.12  | 0.63 | 0.99 |
| D-Arabitol                         | 0.039  | -0.12  | 0.20  | 0.63 | 0.99 |
| L-Norleucine                       | 0.038  | -0.12  | 0.20  | 0.64 | 0.99 |
| Ornithine                          | -0.037 | -0.20  | 0.12  | 0.64 | 0.99 |
| 1,6-Anhydroglucose                 | -0.037 | -0.20  | 0.12  | 0.64 | 0.99 |
| D-Glucose 6-phosphate              | -0.037 | -0.20  | 0.13  | 0.66 | 0.99 |
| Phenylalanine                      | 0.034  | -0.13  | 0.19  | 0.67 | 0.99 |
| Tryptophan                         | 0.035  | -0.13  | 0.20  | 0.67 | 0.99 |
| D-Glucarate                        | -0.033 | -0.19  | 0.13  | 0.68 | 0.99 |
| Methionine                         | 0.033  | -0.13  | 0.19  | 0.68 | 0.99 |
| Succinic acid-d4                   | 0.032  | -0.13  | 0.19  | 0.69 | 0.99 |
| Oxalic acid                        | -0.032 | -0.19  | 0.13  | 0.70 | 0.99 |
| 4,4-Dibromooctafluorobiphenyl      | 0.031  | -0.13  | 0.19  | 0.70 | 0.99 |
| Proline                            | -0.031 | -0.19  | 0.13  | 0.71 | 0.99 |
| 3-Hydroxyicosatetraenoyl-CoA       | -0.030 | -0.19  | 0.13  | 0.72 | 0.99 |
| Ribonic acid                       | -0.029 | -0.19  | 0.13  | 0.72 | 0.99 |
| 1,5-Anhydrohexitol                 | -0.029 | -0.19  | 0.13  | 0.72 | 0.99 |
| L-Histidine                        | 0.029  | -0.13  | 0.19  | 0.72 | 0.99 |
| 3-Indolepropionic acid             | -0.029 | -0.19  | 0.13  | 0.72 | 0.99 |
| Ethanolamine                       | -0.029 | -0.19  | 0.13  | 0.73 | 0.99 |

|                                   |         |       |      |      |       |
|-----------------------------------|---------|-------|------|------|-------|
| Glyceric acid                     | -0.028  | -0.19 | 0.13 | 0.73 | 0.99  |
| Leucine                           | 0.028   | -0.13 | 0.19 | 0.73 | 0.99  |
| Glycine                           | -0.028  | -0.19 | 0.13 | 0.73 | 0.99  |
| 2-Keto-3-methylpentanoic acid     | -0.028  | -0.19 | 0.14 | 0.74 | 0.99  |
| 3-Pyridinol                       | -0.026  | -0.19 | 0.14 | 0.75 | 0.99  |
| Valine                            | -0.025  | -0.18 | 0.13 | 0.75 | 0.99  |
| Triethylene glycol                | -0.025  | -0.19 | 0.13 | 0.76 | 0.99  |
| n-Propylamine                     | -0.025  | -0.19 | 0.13 | 0.76 | 0.99  |
| L-Threonic acid                   | -0.024  | -0.18 | 0.13 | 0.76 | 0.99  |
| Putrescine                        | -0.024  | -0.18 | 0.14 | 0.77 | 0.99  |
| Tyrosine                          | -0.023  | -0.18 | 0.14 | 0.77 | 0.99  |
| Benzoic acid                      | 0.023   | -0.14 | 0.19 | 0.78 | 0.99  |
| Myo-Inositol                      | -0.023  | -0.18 | 0.14 | 0.78 | 0.99  |
| Hydroquinone                      | -0.022  | -0.18 | 0.14 | 0.79 | 0.99  |
| Urea                              | -0.022  | -0.18 | 0.14 | 0.79 | 0.99  |
| 3-Indoleacetic acid               | -0.021  | -0.18 | 0.14 | 0.79 | 0.99  |
| D-(-)-Tagatofuranose              | -0.021  | -0.18 | 0.14 | 0.80 | 0.99  |
| Hexadecanoic acid, butyl          | -0.021  | -0.18 | 0.14 | 0.80 | 0.99  |
| Phenoxyacetic acid                | -0.020  | -0.18 | 0.14 | 0.80 | 0.99  |
| 2-Hydroxybutyric acid             | -0.019  | -0.18 | 0.14 | 0.81 | 0.99  |
| Lysine                            | 0.017   | -0.14 | 0.18 | 0.83 | 0.99  |
| Heptadecanoic acid-d33            | 0.017   | -0.14 | 0.18 | 0.84 | 0.99  |
| Sorbitol                          | -0.015  | -0.18 | 0.15 | 0.86 | 0.99  |
| L-2-Aminobutyric acid             | -0.014  | -0.17 | 0.15 | 0.86 | 0.99  |
| Isobutylamine                     | -0.014  | -0.18 | 0.15 | 0.86 | 0.99  |
| 2-hydroxypropanoic acid           | 0.014   | -0.15 | 0.17 | 0.87 | 0.99  |
| $\alpha$ -D-(-)-Tagatopyran       | -0.014  | -0.18 | 0.15 | 0.87 | 0.99  |
| N-Methyl-DL-Alanine               | -0.012  | -0.17 | 0.15 | 0.88 | 0.99  |
| Maltose                           | -0.012  | -0.17 | 0.15 | 0.88 | 0.99  |
| L-Arginine                        | 0.011   | -0.15 | 0.17 | 0.89 | 0.99  |
| L- $\alpha$ -Aminobutyric acid    | -0.011  | -0.17 | 0.15 | 0.90 | 0.99  |
| L-(-)-Sorbitol                    | -0.011  | -0.17 | 0.15 | 0.90 | 0.99  |
| D-Fucitol                         | -0.010  | -0.17 | 0.15 | 0.90 | 0.99  |
| meso-Erythritol                   | -0.010  | -0.17 | 0.15 | 0.90 | 0.99  |
| Threonine                         | -0.009  | -0.17 | 0.15 | 0.92 | 0.99  |
| Citric acid                       | 0.008   | -0.15 | 0.17 | 0.92 | 0.99  |
| d-Glucose                         | 0.008   | -0.15 | 0.17 | 0.92 | 0.99  |
| Glycolic acid                     | 0.007   | -0.15 | 0.17 | 0.93 | 0.99  |
| Succinic acid                     | 0.006   | -0.15 | 0.17 | 0.94 | 0.99  |
| Quinic acid                       | 0.005   | -0.15 | 0.16 | 0.95 | 0.99  |
| Glycerol                          | -0.005  | -0.17 | 0.16 | 0.95 | 0.99  |
| L-(-)-Arabitol                    | 0.005   | -0.15 | 0.16 | 0.96 | 0.99  |
| Alanine                           | -0.005  | -0.16 | 0.16 | 0.96 | 0.99  |
| 4-Methylvaleric acid              | -0.004  | -0.16 | 0.16 | 0.96 | 0.99  |
| D-(+)-Xylose                      | 0.004   | -0.16 | 0.16 | 0.96 | 0.99  |
| L-Norvaline                       | -0.004  | -0.16 | 0.16 | 0.96 | 0.99  |
| Serine                            | -0.004  | -0.16 | 0.16 | 0.96 | 0.99  |
| D-Gluconic acid                   | 0.002   | -0.16 | 0.16 | 0.98 | 0.995 |
| Glutamine                         | 0.001   | -0.16 | 0.16 | 0.99 | 0.998 |
| Docosaheanoic acid                | -0.001  | -0.16 | 0.16 | 0.99 | 0.998 |
| Phosphoric acid, monomethyl ester | -0.0002 | -0.16 | 0.16 | 1.00 | 0.998 |

---
